# Supplementary material for: Effect of Particulate Matter 2.5 on Fetal Growth in Male and Preterm Infants through Oxidative Stress
Source: MDPI journal article supplement (doi:10.3390/antiox12111916), 2023-10-26
Supplement: s1 [file s1]

**Supplementary**

**Supplementary Table S1.** Summary of PM<sub>2.5</sub> concentration (ug/m<sup>3</sup>) by each trimester of pregnancy of Cohort I.

| Exposure<br>period        | Mean  | SD   | Min   | 25 <sup>th</sup> | 50 <sup>th</sup> | 75 <sup>th</sup> | Max   |
|---------------------------|-------|------|-------|------------------|------------------|------------------|-------|
| Entire                    | 27.35 | 4.48 | 17.73 | 23.33            | 27.89            | 30.72            | 41.68 |
| 1 <sup>st</sup> trimester | 28.76 | 7.86 | 14.75 | 21.79            | 27.29            | 35.93            | 50.91 |
| 2 <sup>nd</sup> trimester | 26.59 | 6.77 | 13.74 | 20.99            | 26.20            | 32.22            | 44.74 |
| 3 <sup>rd</sup> trimester | 26.55 | 6.73 | 13.02 | 21.91            | 25.86            | 31.15            | 90.58 |

**Supplementary Table S2.** Subgroup analysis of comparison of PM<sub>2.5</sub> exposure (ug/m<sup>3</sup>) by each trimester in the NBW and LBW at full term of cohort I.

| Exposure period           | All newborns     |                |                | Boys            |                |                | Girls           |                |                |
|---------------------------|------------------|----------------|----------------|-----------------|----------------|----------------|-----------------|----------------|----------------|
|                           | TNBW<br>(n=1485) | TLBW<br>(n=51) | <i>p-Value</i> | TNBW<br>(n=743) | TLBW<br>(n=22) | <i>p-Value</i> | TNBW<br>(n=742) | TLBW<br>(n=29) | <i>p-Value</i> |
| Entire                    | 27.25 ± 4.30     | 27.88 ± 4.12   | 0.30           | 27.38 ± 4.36    | 28.79 ± 4.26   | 0.13           | 27.11 ± 4.25    | 27.14 ± 3.91   | 0.97           |
| 1 <sup>st</sup> trimester | 28.91 ± 7.65     | 30.09 ± 8.00   | 0.28           | 29.20 ± 7.88    | 31.95 ± 8.72   | 0.10           | 28.63 ± 7.41    | 28.56 ± 7.15   | 0.96           |
| 2 <sup>nd</sup> trimester | 26.27 ± 6.80     | 27.00 ± 6.37   | 0.45           | 26.35 ± 6.74    | 28.32 ± 6.72   | 0.17           | 26.20 ± 6.87    | 25.92 ± 5.97   | 0.83           |
| 3 <sup>rd</sup> trimester | 26.38 ± 6.44     | 26.19 ± 6.30   | 0.83           | 26.35 ± 6.32    | 25.11 ± 5.30   | 0.35           | 26.38 ± 6.56    | 27.07 ± 6.99   | 0.59           |

Continuous variables were expressed as mean ± standard deviation (SD) and were compared using the *t*-test. TNBW, term normal birth weight; TLBW, term low birth weight
